# Supplementary material
Source: PubMed Central journal article supplement (PMC6461949)

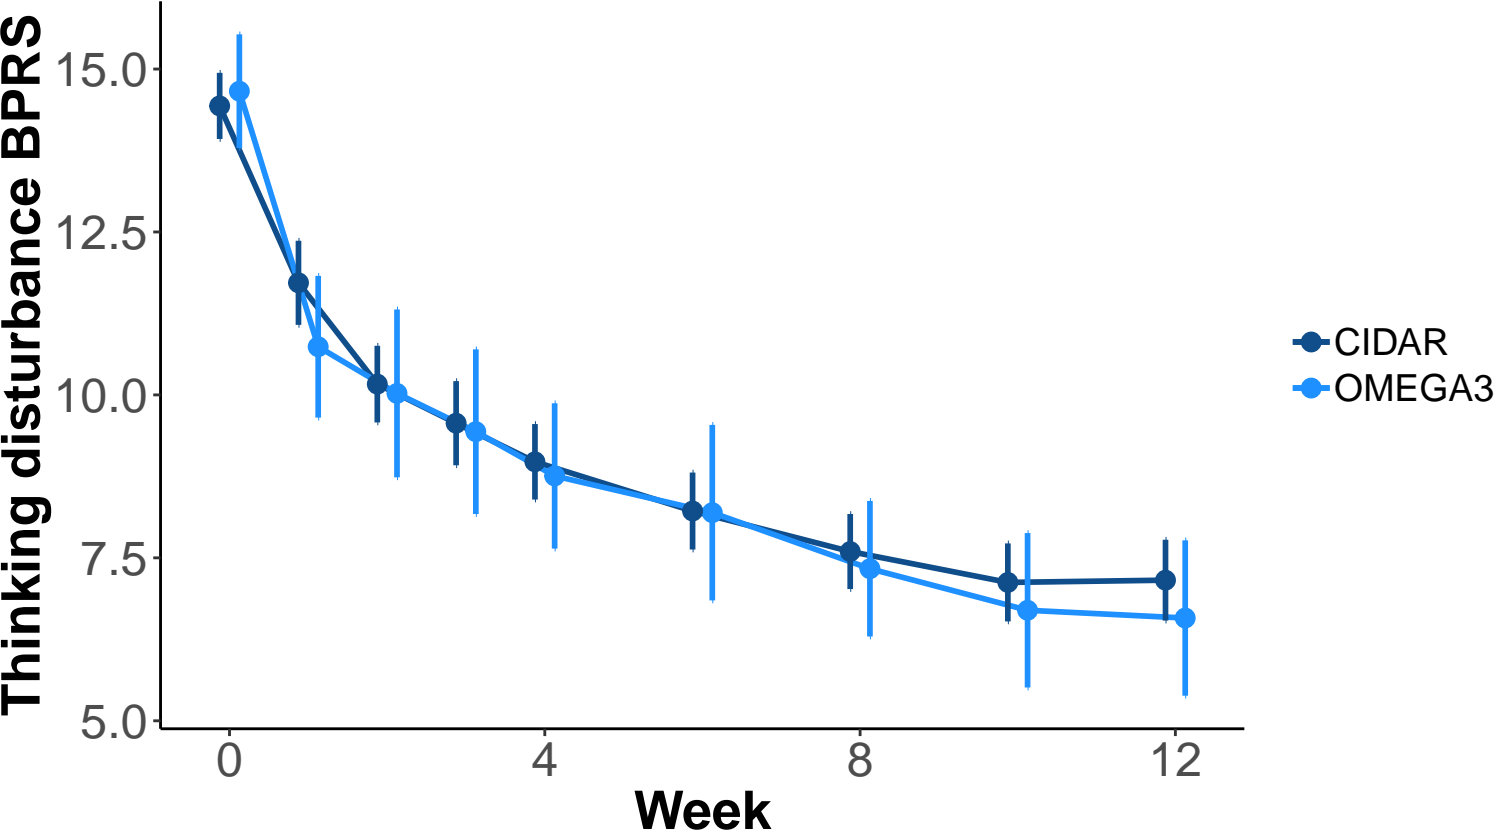

Supplement: 41386_2019_322_MOESM1_ESM.pdf [file 41386_2019_322_MOESM1_ESM.pdf]

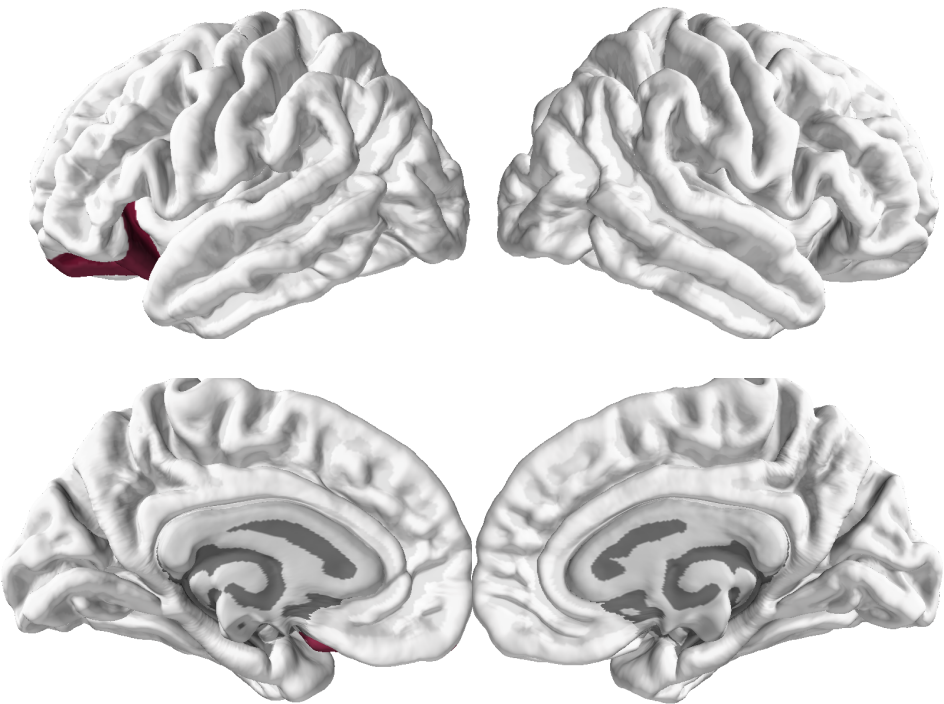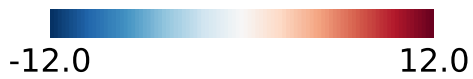

**Degree**

Supplement: 41386_2019_322_MOESM2_ESM.pdf [file 41386_2019_322_MOESM2_ESM.pdf]

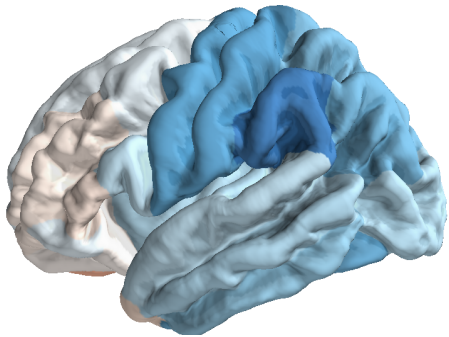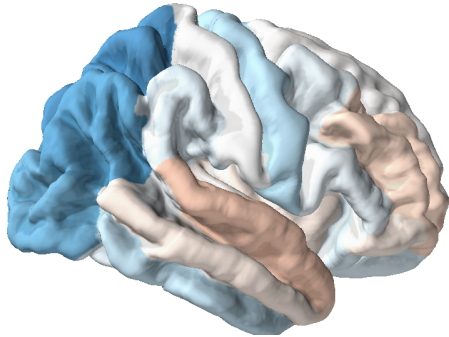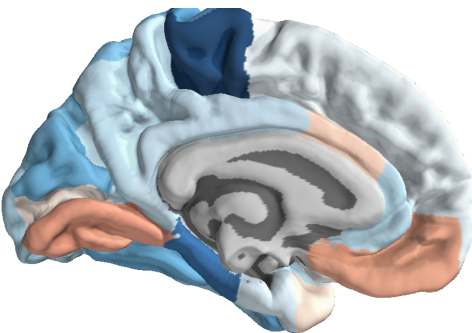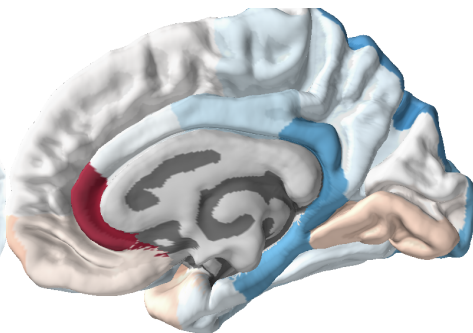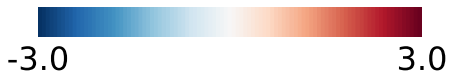

$t$

Supplement: 41386_2019_322_MOESM3_ESM.pdf [file 41386_2019_322_MOESM3_ESM.pdf]
